# Supplementary material for: SARS-CoV-2 rapidly evolves lineage-specific phenotypic differences when passaged repeatedly in immune-naïve mice
Source: PubMed Central journal article supplement (PMC10873417; doi:10.1038/s42003-024-05878-3), 2024-02-16
Supplement: 42003_2024_5878_MOESM2_ESM.pdf [file 42003_2024_5878_MOESM2_ESM.pdf]

Supplementary Table 1

Any variant that clearly changed in MAF during the study

| Variant        | Protein Change      | Annotation (* means druggable for human interacting protein)                 | Potentially Interacting human proteins (* indicates reported as druggable)                                                                                                                                                                                                                                                                                                  | Proteins presently implicated with COVID-19                                                                                                                                                                                                                                                             |
|----------------|---------------------|------------------------------------------------------------------------------|-----------------------------------------------------------------------------------------------------------------------------------------------------------------------------------------------------------------------------------------------------------------------------------------------------------------------------------------------------------------------------|---------------------------------------------------------------------------------------------------------------------------------------------------------------------------------------------------------------------------------------------------------------------------------------------------------|
| A929G          | ORF1ab I222V, nsp2  | Protein interacting*                                                         | GIGYF2, <b>FKBP15*</b> , WASHC4, RAP1GDS1, POR, <b>eIF4E2*</b> , SLC27A2                                                                                                                                                                                                                                                                                                    | GIGYF2 (PMID 35878012)                                                                                                                                                                                                                                                                                  |
| C3042T         | ORF1ab P926L        | None                                                                         | None                                                                                                                                                                                                                                                                                                                                                                        | None                                                                                                                                                                                                                                                                                                    |
| C4763T         | ORF1ab H1500Y       | None                                                                         | None                                                                                                                                                                                                                                                                                                                                                                        | None                                                                                                                                                                                                                                                                                                    |
| C10341T        | ORF1ab P3359L, nsp5 | Protein interacting*                                                         | <b>HDAC2*</b>                                                                                                                                                                                                                                                                                                                                                               | <b>HDAC2</b> (PMID 36758802)                                                                                                                                                                                                                                                                            |
| G10533T        | ORF1ab C3423F, nsp5 | Protein interacting*                                                         | <b>HDAC2*</b>                                                                                                                                                                                                                                                                                                                                                               | <b>HDAC2</b> (PMID 36758802)                                                                                                                                                                                                                                                                            |
| C10809T        | ORF1ab P3515L, nsp5 | Protein interacting*                                                         | <b>HDAC2*</b>                                                                                                                                                                                                                                                                                                                                                               | <b>HDAC2</b> (PMID 36758802)                                                                                                                                                                                                                                                                            |
| A12555C        | ORF1ab E4097A       | Protein interacting                                                          | MPHOSPH10, SRP72, ATE1, NSD2, SRP19, SRP54, MRPS25, MRPS5, EXOSC2, LARP7, MEPCE, MRPS2, HECTD1, AATF, EXOSC3, EXOSC5, SEPSECS, CCDC86, NOL10, NARS2, EXOSC8, MRPS27, DDX10, NGDN                                                                                                                                                                                            | MPHOSPH10 (PMID 35045126), EXOSC2 (PMID 36241425), LARP7 (PMID 33647885), MEPCE (PMID 33883027), MRPS2 (PMID 36371196)                                                                                                                                                                                  |
| A12884G        | ORF1ab T4207A       | Protein interacting*                                                         | <b>NUP214*</b> , FBN2, FBN1, GTF2F2, DCAF7, EIF4H, <b>NUP54*</b> , MIB1, SPART, FBLN5, <b>NUP62*</b> , MAT2B, <b>NUPS8*</b> , <b>NUP88*</b> , ZNF503, <b>NEK9*</b>                                                                                                                                                                                                          | MAT2B (PMID 36371196)                                                                                                                                                                                                                                                                                   |
| C21557T        | Noncoding           | None                                                                         | None                                                                                                                                                                                                                                                                                                                                                                        | None                                                                                                                                                                                                                                                                                                    |
| A21651C        | Spike N30T          | Protein interacting, vaccine target, mutation may confer drug resistance     | GOLGA7, ZDHHC5                                                                                                                                                                                                                                                                                                                                                              | GOLGA7 (PMID 34961524), ZDHHC5 (PMID 34961524)                                                                                                                                                                                                                                                          |
| C22674T        | Spike S371F         | Protein interacting, antibody escape, vaccine target, Omicron VOC            | GOLGA7, ZDHHC5                                                                                                                                                                                                                                                                                                                                                              | GOLGA7 (PMID 34961524), ZDHHC5 (PMID 34961524)                                                                                                                                                                                                                                                          |
| G23593T        | Spike Q677H         | Protein interacting, vaccine target                                          | GOLGA7, ZDHHC5                                                                                                                                                                                                                                                                                                                                                              | GOLGA7 (PMID 34961524), ZDHHC5 (PMID 34961524)                                                                                                                                                                                                                                                          |
| C23606T        | Spike R682W         | Protein interacting, vaccine target, site of positive selection              | GOLGA7, ZDHHC5                                                                                                                                                                                                                                                                                                                                                              | GOLGA7 (PMID 34961524), ZDHHC5 (PMID 34961524)                                                                                                                                                                                                                                                          |
| C23613T        | Spike A684V         | Protein interacting, vaccine target                                          | GOLGA7, ZDHHC5                                                                                                                                                                                                                                                                                                                                                              | GOLGA7 (PMID 34961524), ZDHHC5 (PMID 34961524)                                                                                                                                                                                                                                                          |
| C24237T        | Spike A892V         | Protein interacting, vaccine target, potential pathogenic insertion/deletion | GOLGA7, ZDHHC5                                                                                                                                                                                                                                                                                                                                                              | GOLGA7 (PMID 34961524), ZDHHC5 (PMID 34961524)                                                                                                                                                                                                                                                          |
| A25107G        | Spike E1182G        | Protein interacting, vaccine target                                          | GOLGA7, ZDHHC5                                                                                                                                                                                                                                                                                                                                                              | GOLGA7 (PMID 34961524), ZDHHC5 (PMID 34961524)                                                                                                                                                                                                                                                          |
| TAATC26160TATC | ORF3a NP257-258IX   | Protein interacting, site of positive selection                              | HMOX1, TRIM59, ARL6IP6, VPS39, CLCC1, VPS11, SUN2, ALG5                                                                                                                                                                                                                                                                                                                     | TRIM59 (PMID 36523164)                                                                                                                                                                                                                                                                                  |
| T27638C        | ORF7a V82A          | Protein interacting, Delta VOC                                               | HEATR3, MDN1                                                                                                                                                                                                                                                                                                                                                                | None                                                                                                                                                                                                                                                                                                    |
| C27752T        | ORF7a T120I         | Protein interacting, Delta VOC                                               | HEATR3, MDN1                                                                                                                                                                                                                                                                                                                                                                | None                                                                                                                                                                                                                                                                                                    |
| CA27752TC      | ORF7a T120I         | Protein interacting, Delta VOC                                               | HEATR3, MDN1                                                                                                                                                                                                                                                                                                                                                                | None                                                                                                                                                                                                                                                                                                    |
| C27925T        | ORF8 T11I           | None                                                                         | None                                                                                                                                                                                                                                                                                                                                                                        | None                                                                                                                                                                                                                                                                                                    |
| G28237T        | ORF8 R115L          | Protein interacting*                                                         | COL6A1, PCSK6, <b>LOX*</b> , <b>DNMT1*</b> , NPC2, CISD3, ITGB1, PLAT, STC2, TOR1A, <b>PLOD2*</b> , INHBE, CHPF2, UGGT2, FBXL12, PLEKHF2, SMOC1, POFUT1, <b>FKBP10*</b> , ERLEC1, IL17RA, ADAMTS1, HS6ST2, SDF2, NEU1, GDF15, TM2D3, SIL1, EDEM3, ERP44, PVR, NGLY1, OS9, ADAM9, NPTX1, POGLUT2, POGLUT3, ERO1B, PLD3, FOXRED2, CHPF, PUSL1, HYOU1, MFGE8, FKBP7, GGH, EMC1 | COL6A1 (PMID 35468151), <b>LOX</b> (PMID 34616409), PLAT (PMID 34786557), <b>PLOD2</b> (PMID 33328453), FBXL12 (PMID 34183789), <b>FKBP10</b> (PMID 35571107), IL17RA (PMID 33723527), HS6ST2 (PMID 32970989), NEU1 (PMID 36714013), GDF15 (PMID 35251002), ADAM9 (PMID 34698500), PLD3 (PMID 36182629) |
| C28320T        | Nucleoprotein T16M  | Protein interacting*                                                         | PABPC1, RPL36, RRP9, G3BP2, RBM28, DDX21, MOV10, UPF1, SNIP1, FAM98A, <b>LARP1*</b> , PABPC4, G3BP1, <b>CSNK2B*</b> , <b>CSNK2A2*</b> , CHMP2A, SLC9A3R1, CSDE1, TOMM70, <b>MARK3*</b> , <b>MARK2*</b> , <b>DCTPP1*</b> , MARK1, PTBP2, BAG5, DPH5                                                                                                                          | DDX21 (PMID 35107372), MARK1 (PMID 36327219)                                                                                                                                                                                                                                                            |
| G28368A        | Nucleoprotein R32H  | Protein interacting*                                                         | PABPC1, RPL36, RRP9, G3BP2, RBM28, DDX21, MOV10, UPF1, SNIP1, FAM98A, <b>LARP1*</b> , PABPC4, G3BP1, <b>CSNK2B*</b> , <b>CSNK2A2*</b> , CHMP2A, SLC9A3R1, CSDE1, TOMM70, <b>MARK3*</b> , <b>MARK2*</b> , <b>DCTPP1*</b> , MARK1, PTBP2, BAG5, DPH5                                                                                                                          | DDX21 (PMID 35107372), MARK1 (PMID 36327219)                                                                                                                                                                                                                                                            |
| TACGA29748TA   | Noncoding           | None                                                                         | None                                                                                                                                                                                                                                                                                                                                                                        | None                                                                                                                                                                                                                                                                                                    |
| T29821G        | Noncoding           | None                                                                         | None                                                                                                                                                                                                                                                                                                                                                                        | None                                                                                                                                                                                                                                                                                                    |

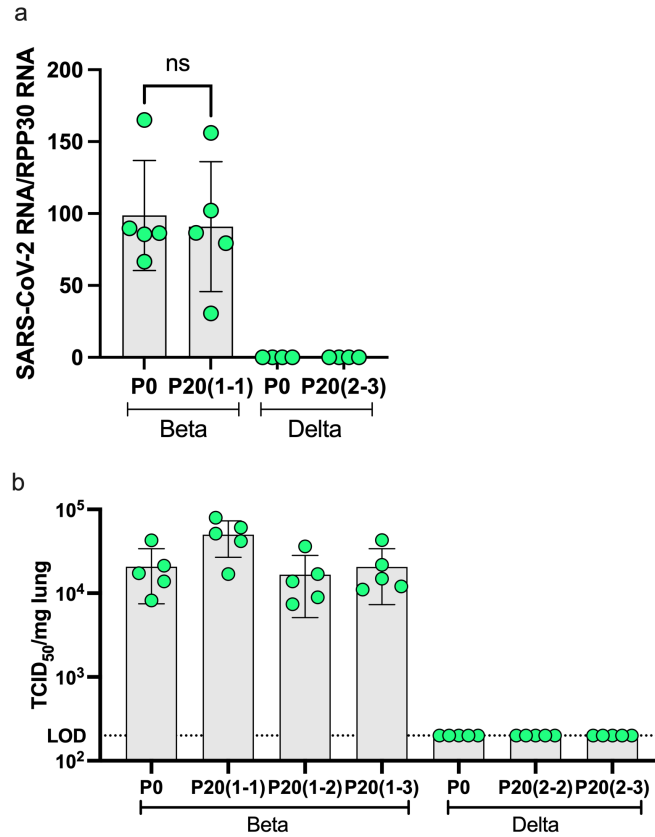

**Supplementary Figure 1. Infection of C57BL6 mice with P0 and P20 Beta and Delta viruses.** Mice (n = 5/group) were infected intranasally with 3000 TCID<sub>50</sub> of P0 and P20 Beta (1-1, 1-2 or 1-3) and Delta (2-2 or 2-3) viruses. On the third day post infection, mice were euthanized and lungs collected for RNA extraction and infectious viral load determination. a) Mean +/- SD of normalized SARS-CoV-2 RNA copies as determined using ddPCR. b) Mean TCID<sub>50</sub>/mg of lung tissue. LOD=limit of detection. ns signifies not significant, using a two-tailed paired t-test.

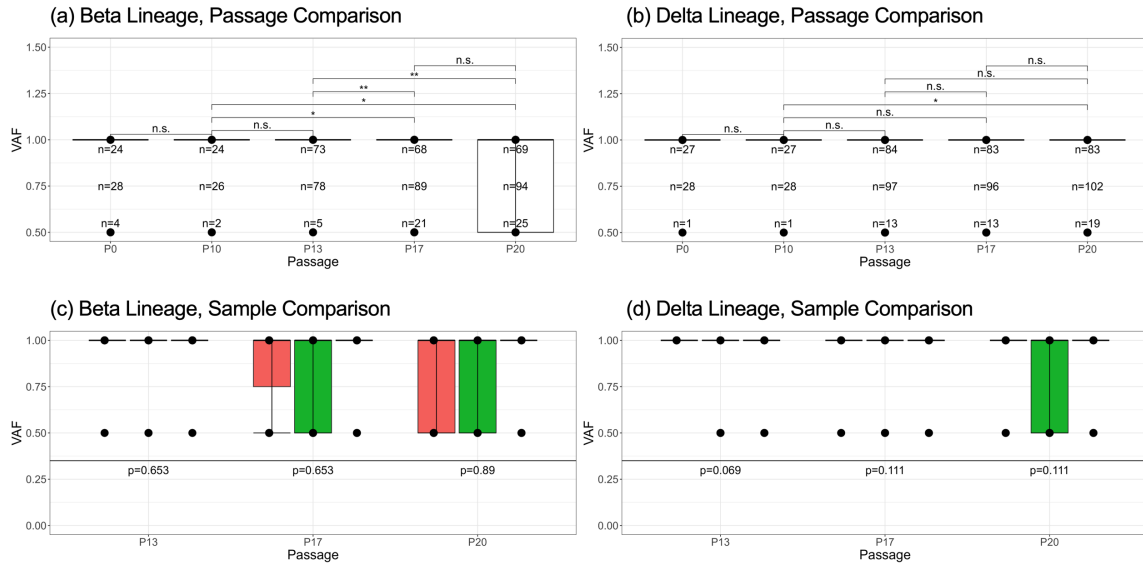

**Supplemental Figure 2. Boxplots of variant allele frequency by (a-b) passage and (c-d) sample.** Each N refers to the number of variant alleles for each variant allele frequency (VAF), determined using freebayes, and in total against the NC\_045512.2 reference sequence. Single samples were sequenced for P0 and P10 with three samples from P13, P17, and P20. Box fill in (c-d) signifies sample number. For significance, n.s.: adjusted p-value > 0.05, \*: adjusted p-value > 0.01, \*\*: adjusted p-value ≤ 0.01, using two-tailed unpaired t-tests.

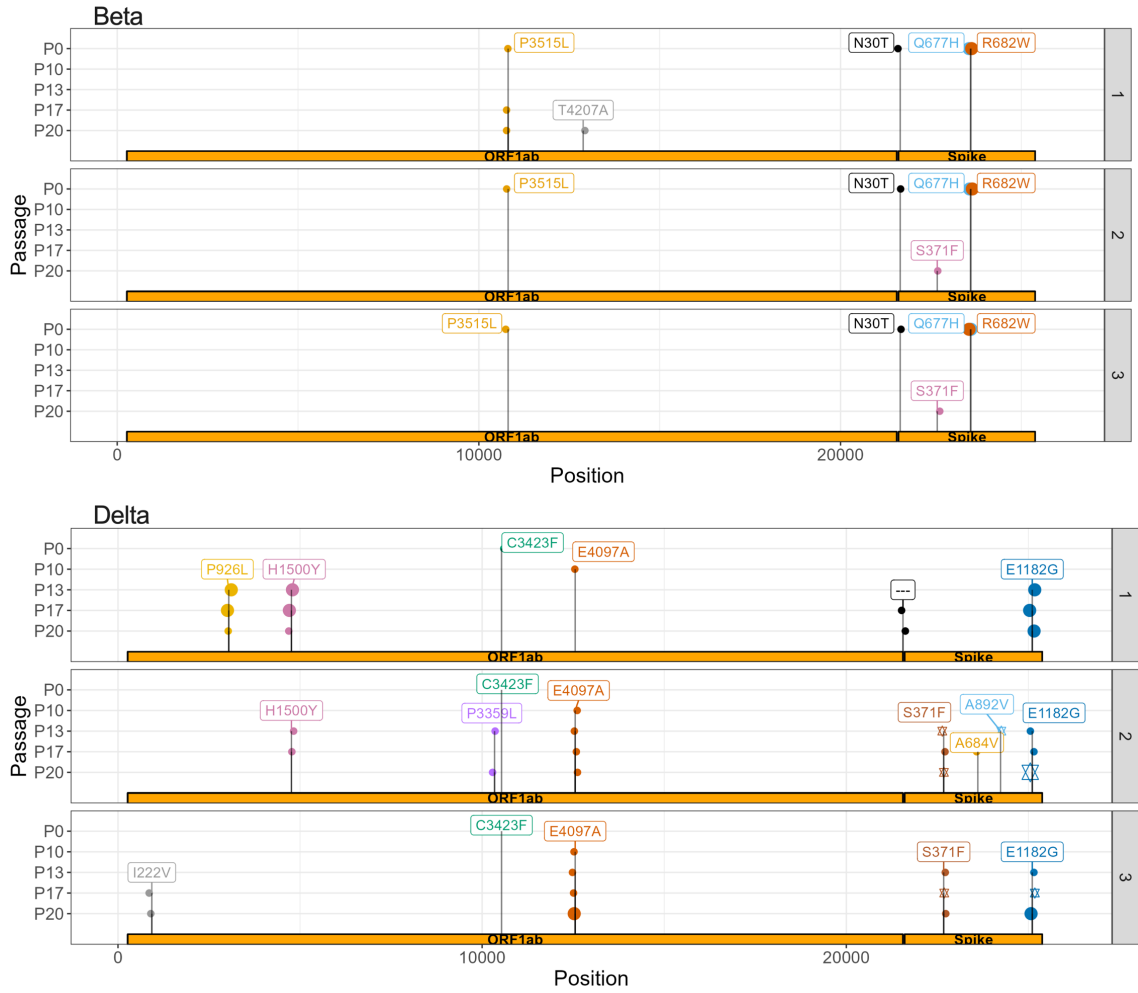

Supplemental Figure 3. More novel, high confidence, non-synonymous, changing alleles appeared in Delta versus Beta in the ORF1ab coding region. VAF: variant allele frequency. P refers to passage. Variant allele incidence by sample in Delta lineage virus. Larger points represent variant alleles with a within-sample, Illumina-derived allele-frequency of 1.0, smaller ones 0.5. Stars in a given passage represent alleles that are likely co-inherited per Nanopore sequencing.
