# Supplementary material for: SARS-CoV-2 rapidly evolves lineage-specific phenotypic differences when passaged repeatedly in immune-naïve mice
Source: PubMed Central journal article supplement (PMC10873417; doi:10.1038/s42003-024-05878-3), 2024-02-16
Supplement: 42003_2024_5878_MOESM3_ESM.pdf [file 42003_2024_5878_MOESM3_ESM.pdf]

## **Description of Additional Supplementary Files**

**File name:** Supplementary Data 1

**Description:** Numerical source data for the graphs in Figures 2-8.
